# Supplementary material for: Chiral ionic liquid crystals with a bulky rigid core from renewable camphorsulfonic acid
Source: Royal Society of Chemistry journal article supplement (doi:10.1039/c4ra01510j), 2014-01-01
Supplement: c4ra01510j1.pdf [file c4ra01510j1.pdf]

**Chiral ionic liquid crystals with a bulky rigid core from renewable  
camphorsulfonic acid**

Xiaoping Rao,<sup>a,b,c</sup> Jinwen Zhang,<sup>\*b</sup> Jianqiang Zheng,<sup>a</sup> Zhanqian Song<sup>a</sup> and Shibin

Shang<sup>a</sup>

<sup>a</sup> Institute of Chemical Industry of Forestry Products, CAF; Key Lab. of Biomass Energy and Material, Jiangsu Province; National Engineering Lab. for Biomass Chemical Utilization; Key and Lab. on Forest Chemical Engineering, SFA, Nanjing 210042, China. Fax: + 86 25-85413445; Tel: + 86-25-85482452; E-mail: rxping2001@163.com

<sup>b</sup> School of Mechanical and Materials Engineering, Composite Materials and Engineering Center, Washington State University, Pullman, WA, 99164, USA. Fax: +1 509-335-5077; Tel: +1 509-335-8723; E-mail: jwzhang@wsu.edu

<sup>c</sup> Institute of Forest New Technology, CAF, Beijing 100091, PR China

\* To whom correspondence should be addressed. Tel.: 509-335-8723; Fax: 509-335-5077; E-mail: jwzhang@wsu.edu.

## 1. TGA results

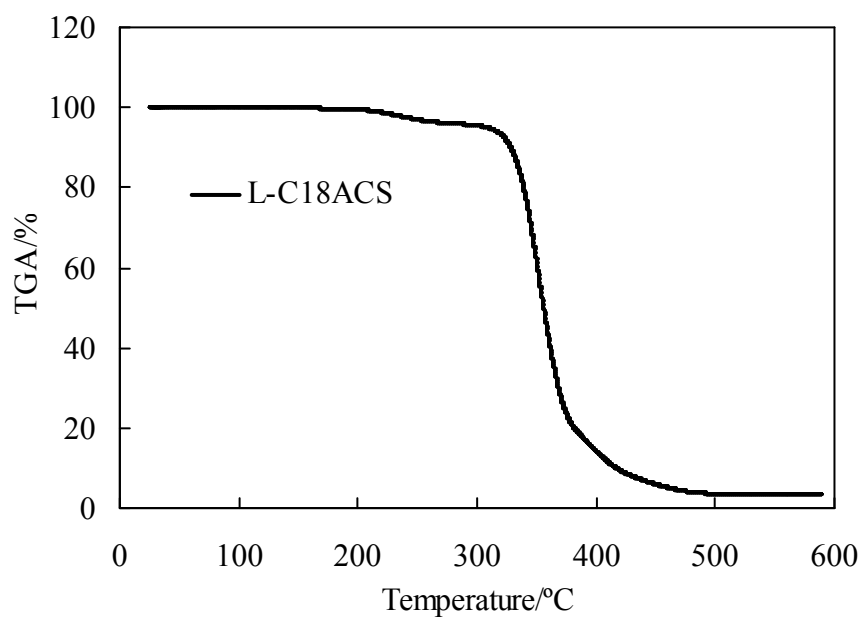

**Figure S1.** TGA curve of L-C<sub>18</sub>ACS measured in the N<sub>2</sub> atmosphere.

## 2. FTIR spectra of D -C<sub>n</sub>ACSs

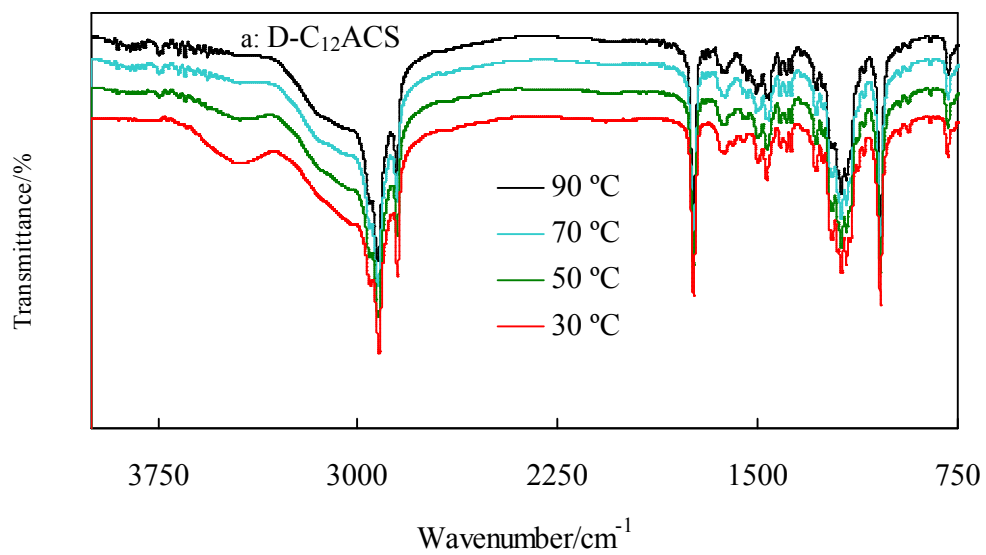

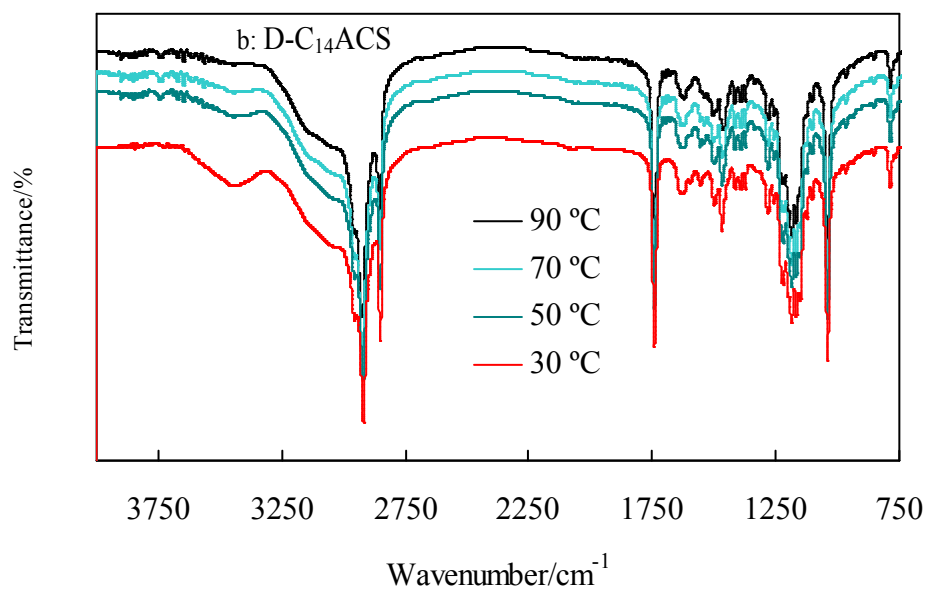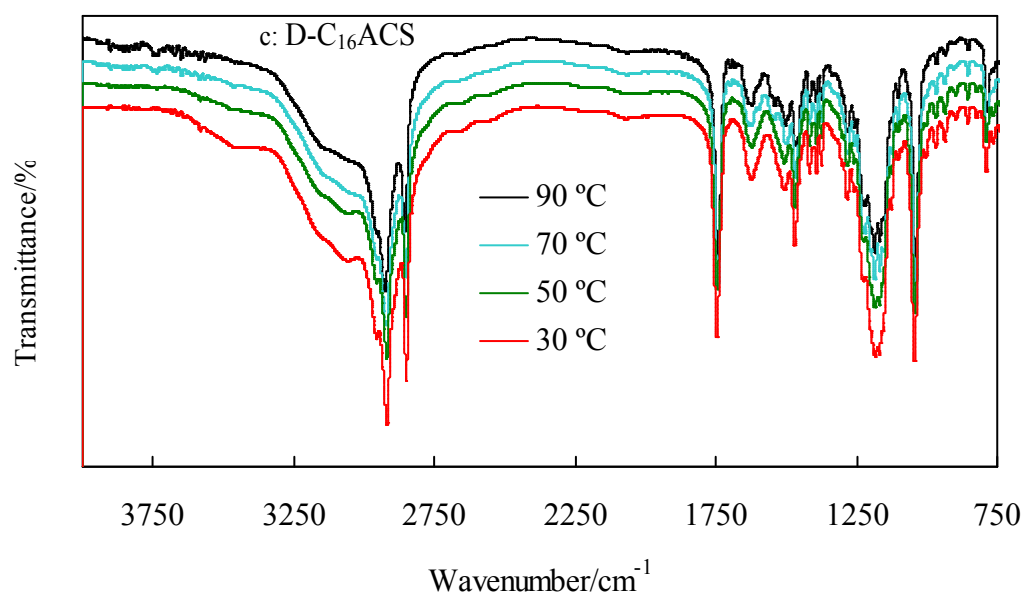

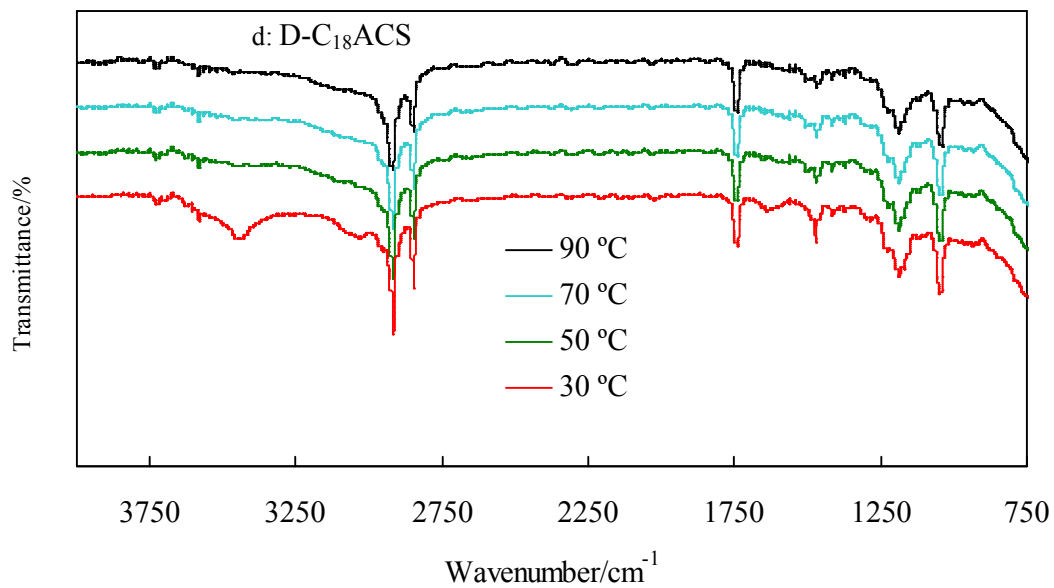

**Figure S2.** FTIR spectra of (a) D-C<sub>12</sub>ACS, (b) D-C<sub>14</sub>ACS, (c) D-C<sub>16</sub>ACS and (d) D-C<sub>18</sub>ACS at different temperatures.

### 3. X-Ray diffraction patterns of D-C<sub>n</sub>ACSs

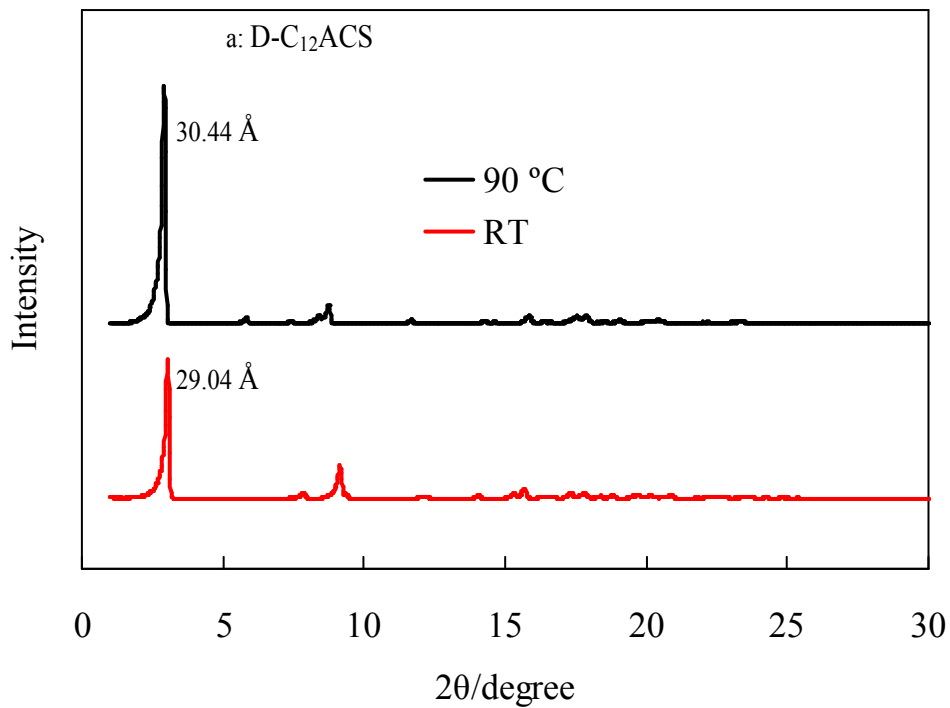

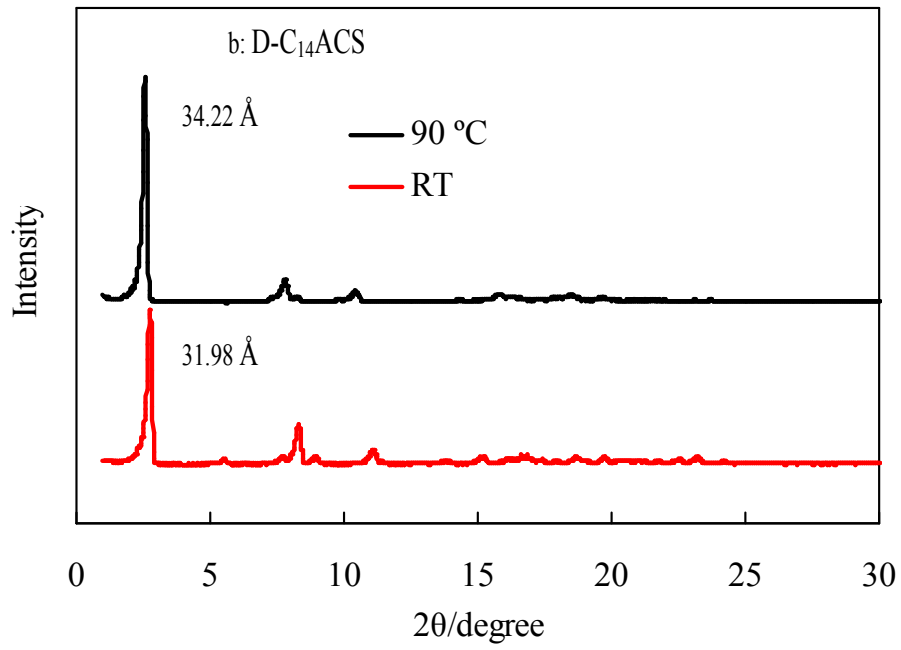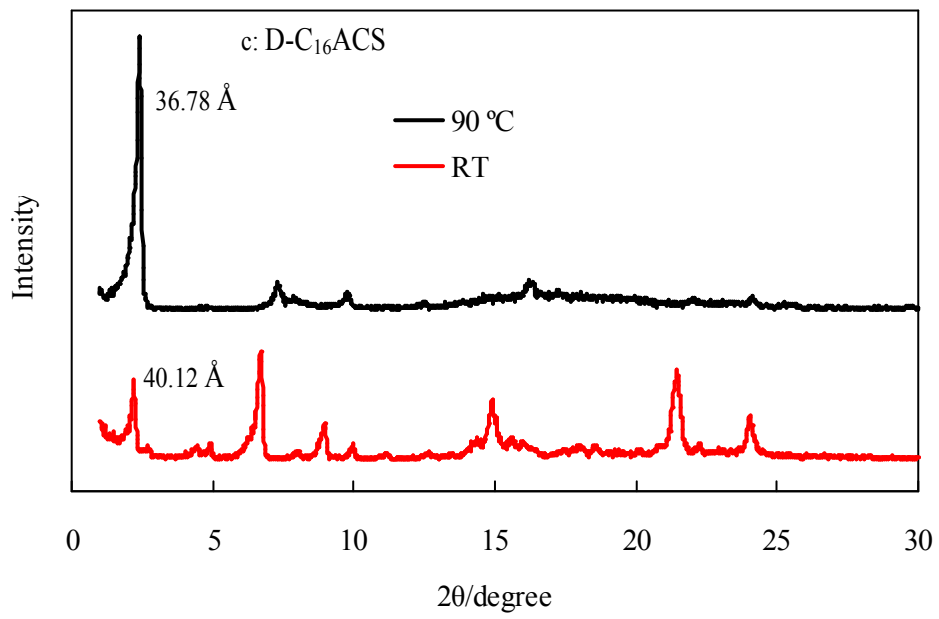

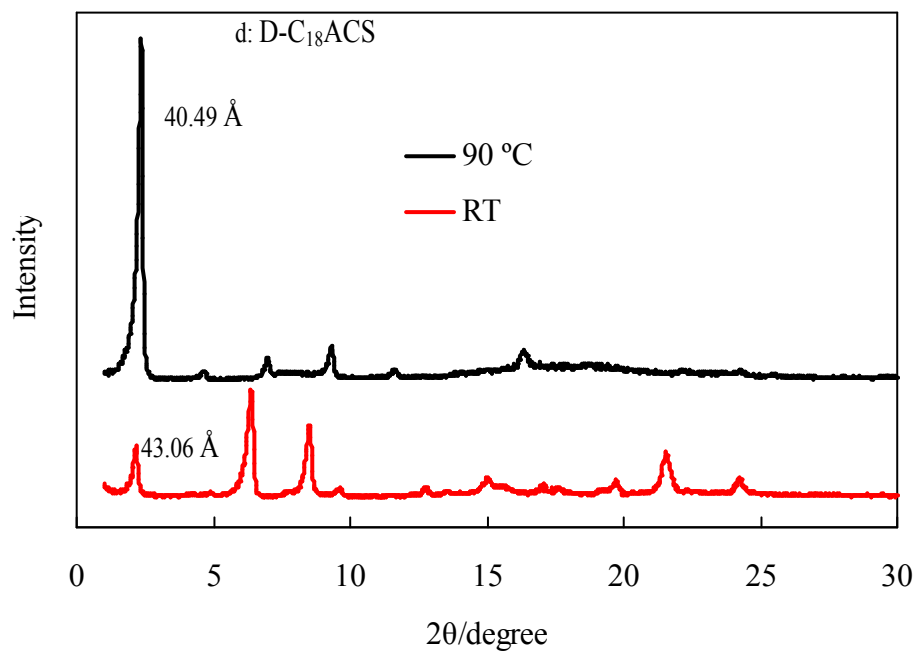

**Figure S3.** X-Ray diffraction patterns of (a) D-C<sub>12</sub>ACS, (b) D-C<sub>14</sub>ACS, (c) D-C<sub>16</sub>ACS and (d) D-C<sub>18</sub>ACS at room temperature and 90 °C.
